# Supplementary material for: Study of fuchsine adsorption on magnetic chitosan/graphene oxide
Source: Royal Society of Chemistry journal article supplement (doi:10.1039/c4ra01784f), 2014-01-01
Supplement: c4ra01784f1.pdf [file c4ra01784f1.pdf]

**Table S1.** Parameters for pseudo-first and second order kinetic models.

| Models              | Rate constant                         | $q_e$ | $R^2$  |
|---------------------|---------------------------------------|-------|--------|
| pseudo-first order  | $K_1(\text{min}^{-1})$<br>0.024       | 12.75 | 0.4577 |
| pseudo-second order | $K_2(\text{g.mg.min}^{-1})$<br>0.0009 | 32.71 | 0.9809 |

**Table S2.** properties of chitosan and graphite oxide

| Samples        | adsorption<br>capacity/ $\text{mg.g}^{-1}$ | Isotherm model | Kinetic model       |
|----------------|--------------------------------------------|----------------|---------------------|
| chitosan       | 13.45                                      | Langmuir model | pseudo-second-order |
| graphene oxide | 21.37                                      | Langmuir model | pseudo-second-order |
